# Supplementary material
Source: publisher figshare collection journal article supplement (https://acs.figshare.com/ndownloader/files/4311790)
Supplement: Supplementary file 1 [file 4311790]

*Supporting Information for*

**Anisotropic Hydrogel from Complexation-Driven Reorientation of  
Semi-Rigid Polyanion at Ca<sup>2+</sup> Diffusion Flux Front**

*Zi Liang Wu<sup>1</sup>, Takayuki Kurokawa<sup>2,3</sup>, Daisuke Sawada<sup>1</sup>, Jian Hu<sup>1</sup>, Hidemitsu Furukawa<sup>2,§</sup>, and Jian Ping Gong<sup>2,\*</sup>*

*<sup>1</sup>Division of Biological Sciences, Graduate School of Science, Hokkaido University, Sapporo 060-0810, Japan; <sup>2</sup>Faculty of Advanced Life Science, Graduate School of Science, Hokkaido University, Sapporo 060-0810, Japan; <sup>3</sup>Creative Research Initiative Sousei, Hokkaido University, Sapporo 001-0021, Japan.*

[\*] Corresponding author

E-mail: gong@mail.sci.hokudai.ac.jp

[§] Present address: Yamagata University, 4-3-16 Jonan, Yonezawa-shi, Yamagata 992-8510, Japan.

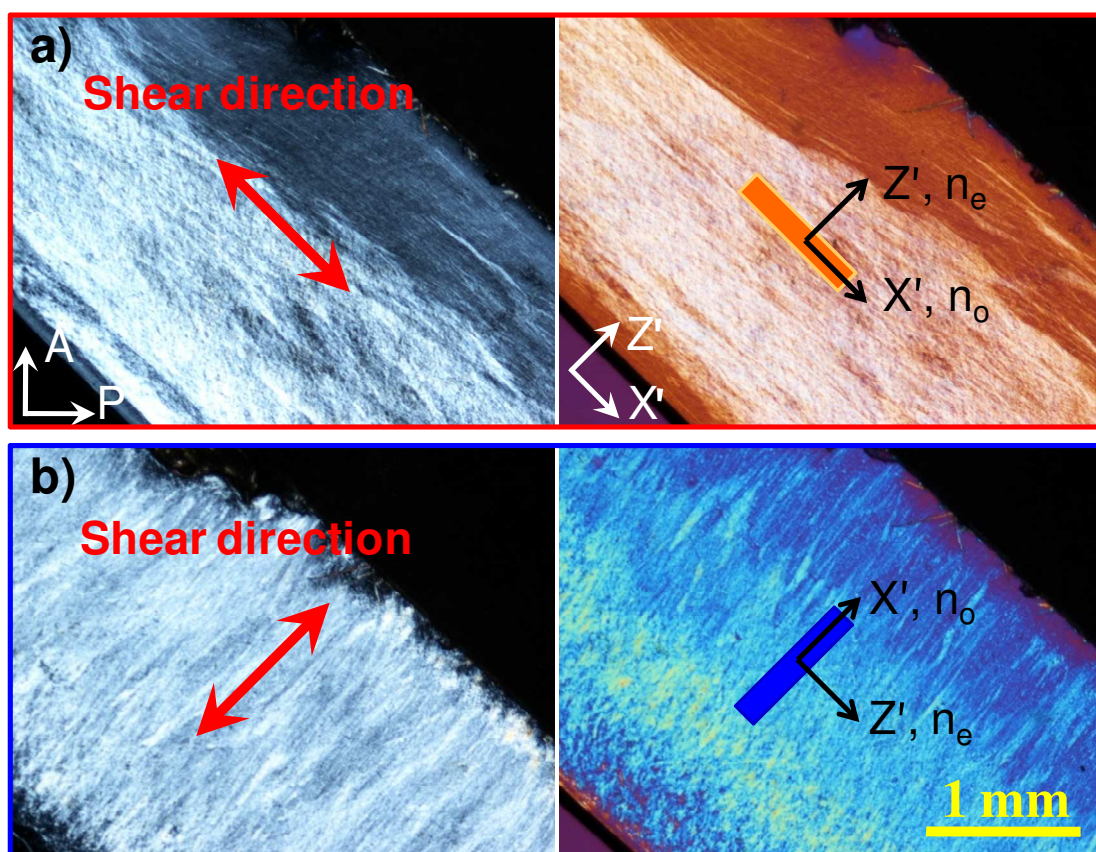

**Figure S1.** Micrographs of 2 wt% PBDT aqueous solution under translation shearing observed under polarizing microscope. Shearing direction: northwest (a), southwest (b); the right images are observed with insertion of a 530 nm tint plate. Since the shearing-induced birefringence of PBDT solution is in the first order white-grey region, the molecular optical properties can be judged by the birefringent color after insertion of 530 nm tint plate. The PBDT orientation and its fast axis ( $X'$ ) and slow axis ( $Z'$ ) are schemed in the right micrographs.

**Figure S1.** Z. L. Wu, et al.
